# Supplementary material
Source: PubMed Central journal article supplement (PMC208808)

+ Ab      Control

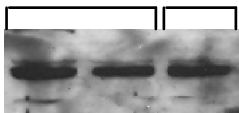

Akt1, Lysate

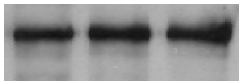

Foxa-2, Lysate

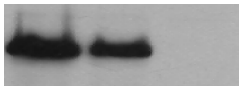

Akt1, IP

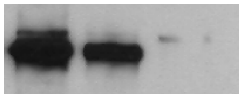

Foxa-2, IP

Supplement: pnas_100_20_11624__2.pdf [file pnas_100_20_11624__2.pdf]
